# Supplementary material for: Imaging the mammary gland and mammary tumours in 3D: optical tissue clearing and immunofluorescence methods
Source: PubMed Central journal article supplement (PMC5155399; doi:10.1186/s13058-016-0754-9), 2016-12-13

# Modified CUBIC clearing in the mammary gland - Reagent 1A

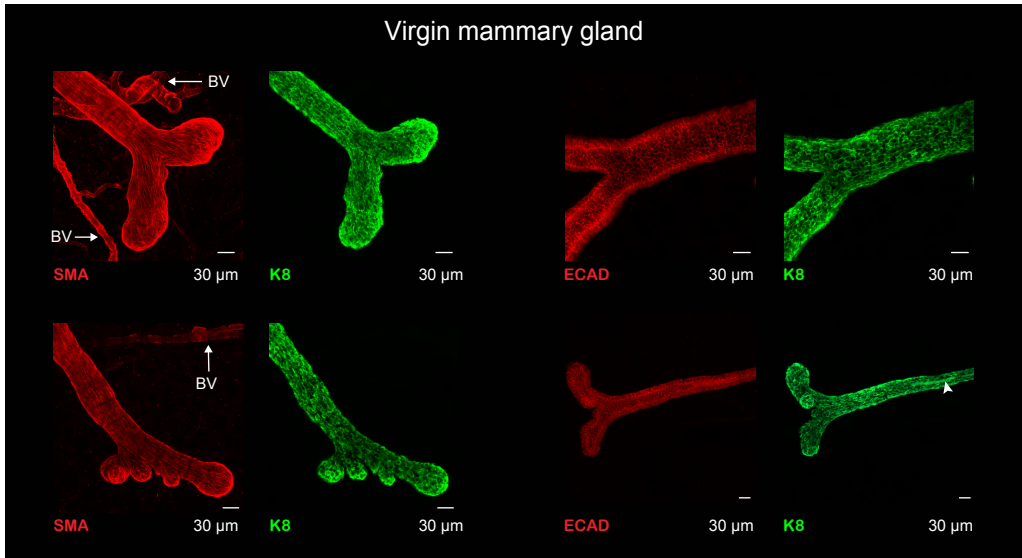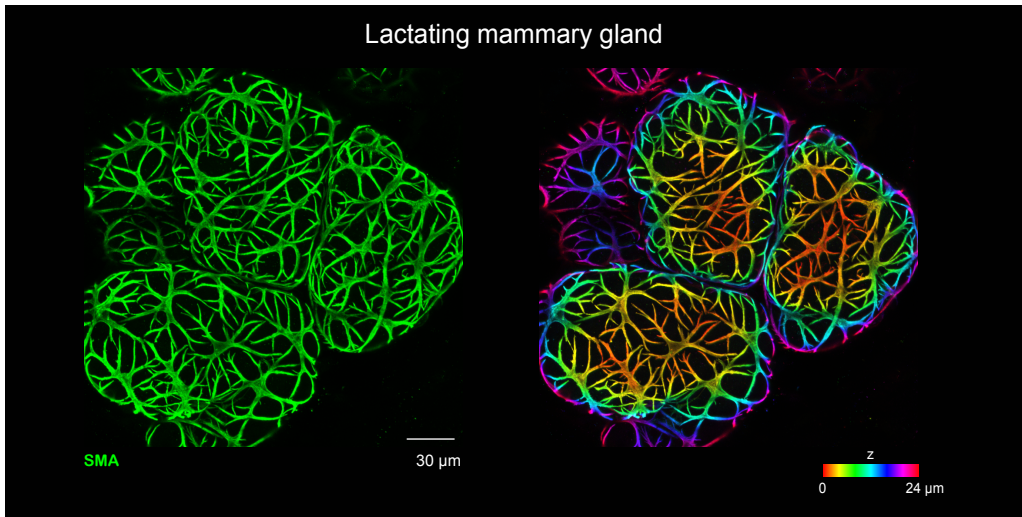

Supplement: 13058_2016_754_MOESM9_ESM.pdf [file 13058_2016_754_MOESM9_ESM.pdf]
